# Supplementary material
Source: publisher figshare collection journal article supplement (https://karger.figshare.com/articles/dataset/_/4859606)
Supplement: Supplementary file 1 [file 1]

Archive with 3 entries (3 files):
- AHA463534_sm1.PDF
- AHA463534_sTable_1.PDF
- AHA463534_sTable2.PDF
