# Supplementary material
Source: publisher figshare collection journal article supplement (https://karger.figshare.com/articles/dataset/_/4859606)
Supplement: Supplementary file 1 [file 1 › AHA463534_sTable2.PDF]

| Haematological response  | Single ASCT (N=286) |     | Tandem ASCT (N=34) |     |
|--------------------------|---------------------|-----|--------------------|-----|
|                          | No.                 | (%) | No.                | (%) |
| <b>Pre-ASCT</b>          |                     |     |                    |     |
| available                | 238                 | 83  | 32                 | 94  |
| unavailable              | 48                  | 17  | 2                  | 6   |
| sCR                      | 1                   | <1  | 0                  | 0   |
| CR                       | 22                  | 9   | 0                  | 0   |
| VGPR                     | 41                  | 17  | 2                  | 6   |
| PR                       | 127                 | 53  | 26                 | 81  |
| SD                       | 32                  | 14  | 1                  | 3   |
| PD                       | 15                  | 6   | 3                  | 10  |
| <b>Post-ASCT (d+100)</b> |                     |     |                    |     |
| available                | 224                 | 78  | 33                 | 97  |
| unavailable              | 62                  | 22  | 1                  | 3   |
| sCR                      | 0                   | 0   | 1                  | 3   |
| CR                       | 43                  | 19  | 6                  | 18  |
| VGPR                     | 72                  | 32  | 8                  | 24  |
| PR                       | 88                  | 39  | 15                 | 46  |
| SD                       | 9                   | 4   | 3                  | 10  |
| PD                       | 12                  | 5   | 0                  | 0   |

**Supplemental Table 2. Haematological response - single and tandem ASCT**

sCR, stringent complete remission; CR, complete remission; VGPR, very good partial remission; PR, partial remission; SD, stable disease; PD, progressive disease; available, detailed information available.
