# Supplementary material
Source: publisher figshare collection journal article supplement (https://karger.figshare.com/articles/dataset/_/4859606)
Supplement: Supplementary file 1 [file 1 › AHA463534_sTable_1.PDF]

|                                                                                    |                           | Single ASCT<br>(N=286) |          | 1. Part<br>Tandem ASCT<br>(N=34) |          | 2. Part Tandem<br>ASCT<br>(N=34) |         |
|------------------------------------------------------------------------------------|---------------------------|------------------------|----------|----------------------------------|----------|----------------------------------|---------|
|                                                                                    |                           | No.                    | %        | No.                              | %        | No.                              | %       |
| Stem cell mobilization<br>therapy                                                  | available                 | 245                    | 86       | 34                               | 100      | *                                |         |
|                                                                                    | unavailable               | 41                     | 14       | 0                                | 0        |                                  |         |
|                                                                                    | IEV                       | 168                    | 69       | 23                               | 68       |                                  |         |
|                                                                                    | CA                        | 15                     | 6        | 0                                | 0        |                                  |         |
|                                                                                    | C                         | 36                     | 15       | 7                                | 20       |                                  |         |
|                                                                                    | SS                        | 26                     | 10       | 4                                | 12       |                                  |         |
| No. of collected CD34 <sup>+</sup> cells<br>(x10 <sup>6</sup> per kg body weight)  | median/range              | 11.0                   | 2.9-113  | 13.5                             | 4.0-28.0 |                                  |         |
| No. of transfused CD34 <sup>+</sup> cells<br>(x10 <sup>6</sup> per kg body weight) | median/range              | 4.62                   | 1.3-12.7 | 3.74                             | 1.4-9.1  | 4.0                              | 1.9-9.1 |
| Melphalan dosage<br>(mg/m <sup>2</sup> )                                           | available                 | 246                    | 86       | 33                               | 97       | 33                               | 97      |
|                                                                                    | unavailable               | 40                     | 14       | 1                                | 3        | 1                                | 3       |
|                                                                                    | 200                       | 186                    | 76       | 27                               | 82       | 25                               | 76      |
|                                                                                    | 140                       | 51                     | 20       | 3                                | 9        | 5                                | 15      |
|                                                                                    | 100                       | 9                      | 4        | 3                                | 9        | 3                                | 9       |
|                                                                                    |                           |                        |          |                                  |          |                                  |         |
| Complications<br>- per patient                                                     | available                 | 197                    | 69       | 24                               | 71       | 25                               | 74      |
|                                                                                    | unavailable               | 89                     | 31       | 10                               | 29       | 9                                | 26      |
| Complications<br>total                                                             | yes                       | 145                    | 74       | 15                               | 63       | 18                               | 72      |
|                                                                                    | no                        | 52                     | 26       | 9                                | 38       | 7                                | 28      |
|                                                                                    | <2 complications          | 65                     | 33       | 6                                | 25       | 4                                | 16      |
|                                                                                    | Mucositis grade<br>III/IV | 82                     | 42       | 6                                | 25       | 6                                | 24      |
|                                                                                    | Febrile neutropenia       | 67                     | 34       | 7                                | 29       | 10                               | 40      |
|                                                                                    | Bacteremia                | 9                      | 5        | 2                                | 8        | 2                                | 8       |
|                                                                                    | TRD**                     | 8                      | 3        | 0                                | 0        | 1                                | 3       |
|                                                                                    | Other                     | 33                     | 17       | 4                                | 17       | 3                                | 12      |
| Nadir, days post-ASCT                                                              | median days/range         | 6                      | 3-10     | 5                                | 4-7      | 5                                | 3-6     |
| Neutrophil engraftment<br>(>0.5x10 <sup>9</sup> /l, days post ASCT)                | median days/range         | 12                     | 6-23     | 12                               | 10-17    | 11                               | 10-16   |
| Platelet engraftment<br>(>50 x 10 <sup>9</sup> /l, days post-<br>ASCT)             | median days/range         | 14                     | 8-43     | 13                               | 12-18    | 16                               | 14-17   |
| Platelet engraftment reached                                                       | available                 | 221                    | 77       | 11                               | 32       | 31                               | 91      |
|                                                                                    | unavailable               | 65                     | 23       | 23                               | 68       | 3                                | 9       |
|                                                                                    | yes                       | 103                    | 47       | 6                                | 55       | 5                                | 16      |
|                                                                                    | no                        | 118                    | 53       | 5                                | 45       | 26                               | 84      |

**Supplemental Table 1. Patient characteristics at single and tandem ASCT**

IEV, ifosfamide/epirubicin/etoposide; CA, cyclophosphamide/adriamycin; C, cyclophosphamide; SS, steady-state mobilization; TRD, treatment related death; \* stem cell mobilization therapy and collection only performed before part one of tandem ASCT; \*\*TRD was determined as death from any cause other than progression or relapse before day +100 from last ASCT in patients with a follow-up of ≥100 days after last ASCT; available, detailed information available.
